# Supplementary material for: Association between red blood cell storage duration and clinical outcome in patients undergoing off-pump coronary artery bypass surgery: a retrospective study
Source: PubMed Central journal article supplement (PMC4210472; doi:10.1186/1471-2253-14-95), 2014-10-21
Supplement: 12871_2014_306_MOESM2_ESM.pdf [file 12871_2014_306_MOESM2_ESM.pdf]

## Postoperative new renal failure

|                                       | Unadjusted model |            |         | Adjusted model 1 |            |         | Adjusted model 2 |            |         | Adjusted model 3 |            |         |
|---------------------------------------|------------------|------------|---------|------------------|------------|---------|------------------|------------|---------|------------------|------------|---------|
|                                       | OR               | 95% CI     | P value | OR               | 95% CI     | P value | OR               | 95% CI     | P value | OR               | 95% CI     | P value |
| Total number of transfused RBCs       | 1.05             | 1.03-1.07  | <0.001  | 1.03             | 1.00-1.05  | 0.022   | 1.03             | 1.01-1.06  | 0.005   | 1.03             | 1.01-1.06  | 0.007   |
| Oldest age of transfused RBCs         | 1.08             | 1.03-1.13  | 0.001   | 1.03             | 0.98-1.09  | 0.251   |                  |            |         |                  |            |         |
| Mean age of transfused RBCs           | 0.99             | 0.93-1.05  | 0.684   |                  |            |         | 1.01             | 0.94-1.08  | 0.857   |                  |            |         |
| Any RBCs unit > 14 days               | 1.5              | 0.87-2.60  | 0.148   |                  |            |         |                  |            |         | 1.05             | 0.57-1.97  | 0.869   |
| Age                                   | 1.05             | 1.02-1.09  | 0.003   |                  |            |         |                  |            |         |                  |            |         |
| Male                                  | 2.38             | 1.11-5.10  | 0.026   |                  |            |         |                  |            |         |                  |            |         |
| Body mass index (kg m <sup>-2</sup> ) | 0.97             | 0.88-1.06  | 0.475   |                  |            |         |                  |            |         |                  |            |         |
| Diabetes mellitus                     | 2.56             | 1.41-4.65  | 0.002   |                  |            |         |                  |            |         |                  |            |         |
| Hypertension                          | 2.73             | 1.22-6.10  | 0.015   |                  |            |         |                  |            |         |                  |            |         |
| Dyslipidemia                          | 0.85             | 0.43-1.68  | 0.644   |                  |            |         |                  |            |         |                  |            |         |
| Previous myocardial infarction        | 1.18             | 0.46-3.05  | 0.732   |                  |            |         |                  |            |         |                  |            |         |
| Previous stroke                       | 1.96             | 1.02-3.74  | 0.043   |                  |            |         |                  |            |         |                  |            |         |
| Chronic renal failure                 | 18.11            | 9.80-33.50 | <0.001  | 14.82            | 7.78-28.20 | < 0.001 | 15.23            | 8.02-28.92 | < 0.001 | 15.17            | 7.98-28.81 | < 0.001 |
| LV dysfunction (EF<35%)               | 3.33             | 1.84-6.03  | <0.001  | 2.23             | 1.13-4.43  | 0.022   | 2.24             | 1.13-4.44  | 0.021   | 2.24             | 1.13-4.43  | 0.021   |
| COPD                                  | 6.6              | 1.73-25.1  | 0.006   | 6.85             | 1.27-36.86 | 0.025   | 6.73             | 1.27-35.53 | 0.025   | 6.67             | 1.26-35.23 | 0.026   |

|                              |      |           |       |
|------------------------------|------|-----------|-------|
| Previous cardiac surgery     | 1.15 | 0.27-4.92 | 0.852 |
| Perioperative IABP insertion | 1.54 | 0.84-2.86 | 0.166 |
| Emergent operation           | 2.62 | 1.45-4.73 | 0.001 |
| Duration of surgery (min)    | 1    | 1.00-1.01 | 0.03  |

---

### Postoperative respiratory complication

|                                       | Unadjusted model |            |         | Adjusted model 1 |           |         | Adjusted model 2 |           |         | Adjusted model 3 |           |         |
|---------------------------------------|------------------|------------|---------|------------------|-----------|---------|------------------|-----------|---------|------------------|-----------|---------|
|                                       | OR               | 95% CI     | P value | OR               | 95% CI    | P value | OR               | 95% CI    | P value | OR               | 95% CI    | P value |
| Total number of transfused RBCs       | 1.05             | 1.03-1.07  | <0.001  | 1.05             | 1.02-1.07 | < 0.001 | 1.05             | 1.02-1.07 | < 0.001 | 1.05             | 1.02-1.07 | < 0.001 |
| Oldest age of transfused RBCs         | 1.07             | 1.01-1.13  | 0.02    | 1.01             | 0.95-1.08 | 0.726   |                  |           |         |                  |           |         |
| Mean age of transfused RBCs           | 0.99             | 0.92-1.06  | 0.731   |                  |           |         | 0.98             | 0.90-1.06 | 0.629   |                  |           |         |
| Any RBCs unit > 14 days               | 1.54             | 0.77-3.09  | 0.224   |                  |           |         |                  |           |         | 1.06             | 0.50-2.27 | 0.878   |
| Age                                   | 1.11             | 1.06-1.16  | <0.001  | 1.08             | 1.03-1.14 | 0.002   | 1.08             | 1.03-1.14 | 0.002   | 1.08             | 1.03-1.14 | 0.002   |
| Male                                  | 1.5              | 0.64-3.50  | 0.347   |                  |           |         |                  |           |         |                  |           |         |
| Body mass index (kg m <sup>-2</sup> ) | 0.87             | 0.77-0.99  | 0.03    |                  |           |         |                  |           |         |                  |           |         |
| Diabetes mellitus                     | 1.41             | 0.70-2.85  | 0.334   |                  |           |         |                  |           |         |                  |           |         |
| Hypertension                          | 1.23             | 0.55-2.75  | 0.619   |                  |           |         |                  |           |         |                  |           |         |
| Dyslipidemia                          | 0.33             | 0.1-1.08   | 0.067   | 0.23             | 0.06-0.91 | 0.035   | 0.23             | 0.06-0.89 | 0.034   | 0.23             | 0.06-0.90 | 0.034   |
| Previous myocardial infarction        | 2.66             | 1.07-6.64  | 0.036   |                  |           |         |                  |           |         |                  |           |         |
| Previous stroke                       | 1.06             | 0.40-2.78  | 0.909   |                  |           |         |                  |           |         |                  |           |         |
| Acute renal failure                   | 10.89            | 3.35-35.42 | <0.001  |                  |           |         |                  |           |         |                  |           |         |
| Chronic renal failure                 | 4.07             | 1.98-8.37  | <0.001  | 2.39             | 1.10-5.21 | 0.028   | 2.41             | 1.11-5.23 | 0.027   | 2.4              | 1.10-5.24 | 0.027   |
| LV dysfunction (EF<35%)               | 4.85             | 2.38-9.90  | <0.001  | 3.16             | 1.47-6.79 | 0.003   | 3.16             | 1.47-6.79 | 0.003   | 3.17             | 1.47-6.82 | 0.003   |

|                              |      |            |       |
|------------------------------|------|------------|-------|
| COPD                         | 6.64 | 1.40-31.58 | 0.017 |
| Previous cardiac surgery     | 2.66 | 1.07-6.64  | 0.036 |
| Perioperative IABP insertion | 1.49 | 0.68-3.25  | 0.318 |
| Emergent operation           | 2.56 | 1.22-5.37  | 0.013 |
| Duration of surgery (min)    | 1    | 0.99-1.01  | 0.787 |

---













|                             |      |            |       |
|-----------------------------|------|------------|-------|
| COPD                        | 1.92 | 0.24-15.15 | 0.537 |
| Previous cardiac surgery    | 1.28 | 0.30-5.48  | 0.743 |
| Preoperative IABP insertion | 1.29 | 0.66-2.51  | 0.461 |
| Emergent operation          | 1.28 | 0.63-2.61  | 0.501 |
| Duration of surgery (min)   | 1    | 0.99-1.01  | 0.502 |

---



|                              |      |           |       |      |           |       |      |           |       |      |           |       |
|------------------------------|------|-----------|-------|------|-----------|-------|------|-----------|-------|------|-----------|-------|
| Previous cardiac surgery     | 2.27 | 0.52-9.94 | 0.278 |      |           |       |      |           |       |      |           |       |
| Perioperative IABP insertion | 2.96 | 1.42-6.14 | 0.004 |      |           |       |      |           |       |      |           |       |
| Emergent operation           | 1.92 | 0.84-4.40 | 0.125 |      |           |       |      |           |       |      |           |       |
| Duration of surgery (min)    | 1.01 | 1.00-1.01 | 0.001 | 1.01 | 1.00-1.01 | 0.037 | 1.01 | 1.00-1.01 | 0.031 | 1.01 | 1.00-1.01 | 0.038 |

---
