# Supplementary material for: Association between red blood cell storage duration and clinical outcome in patients undergoing off-pump coronary artery bypass surgery: a retrospective study
Source: PubMed Central journal article supplement (PMC4210472; doi:10.1186/1471-2253-14-95), 2014-10-21
Supplement: 12871_2014_306_MOESM3_ESM.pdf [file 12871_2014_306_MOESM3_ESM.pdf]

**Additional file 3.** Postoperative infections other than wound

Two patients were diagnosed with catheter-related infections, confirmed by blood culture. Both had diabetic end-stage renal disease (ESRD) and were undergoing periodic hemodialysis. One patient was discharged after antibiotics therapy for enterococcal bacteremia (*E. faecalis* was isolated from four blood samples: two peripheral and two central veins, Case 1). Another patient who had gram-positive bacteremia, postoperative pneumonia, and a diabetic foot infection died from septic shock, despite receiving antibiotics therapy (Case 2). Information on the RBCs transfused into the two patients are presented in the table below.

|                                   | Case 1 | Case 2 |
|-----------------------------------|--------|--------|
| Transfused RBCs amount (unit)     | 18     | 19     |
| Oldest age of transfused RBCs (d) | 13     | 20     |
| Mean age of transfused RBCs (d)   | 6.4    | 14.7   |
| Any RBCs unit older than 14 days  | 0      | 1      |
