# Supplementary material for: Association between red blood cell storage duration and clinical outcome in patients undergoing off-pump coronary artery bypass surgery: a retrospective study
Source: PubMed Central journal article supplement (PMC4210472; doi:10.1186/1471-2253-14-95), 2014-10-21
Supplement: 12871_2014_306_MOESM4_ESM.pdf [file 12871_2014_306_MOESM4_ESM.pdf]

#### **Additional file 4.** Postoperative SOFA score and RBCs age

We calculated the postoperative Sepsis related Organ Failure (SOFA) scores [1] and analyzed the relationship with RBCs ages. The total number of transfused RBCs and the oldest age of the transfused RBCs showed significant correlations with the postoperative highest SOFA scores.

|                                                     | <i>r</i> | <i>P</i> -value |
|-----------------------------------------------------|----------|-----------------|
| Amount of transfused RBCs                           | 0.43     | <0.001          |
| Oldest age of transfused RBCs                       | 0.18     | <0.001          |
| after removing the effect of the transfusion amount | 0.1      | 0.002           |
| Mean age of transfused RBCs                         | 0.003    | 0.933           |
| after removing the effect of the transfused amount  | 0.03     | 0.39            |

#### Reference

1. Vincent JL, Moreno R, Takala J, Willatts S, De Mendonca A, Bruining H, Reinhart CK, Suter PM, Thijs LG: **The SOFA (Sepsis-related Organ Failure Assessment) score to describe organ dysfunction/failure. On behalf of the Working Group on Sepsis-Related Problems of the European Society of Intensive Care Medicine.** *Intensive care medicine* 1996, **22**(7):707-710.
